# Supplementary material for: Who is fishing on what stock: population-of-origin of individual cod (Gadus morhua) in commercial and recreational fisheries
Source: Oxford University Press journal article supplement (doi:10.1093/icesjms/fsy080), 2018-06-07
Supplement: fsy080_supplementary_data.doc [file fsy080_supplementary_data.doc]

**Supplementary Data**

**Table S1**. Population samples for genetic analyses. Year is year of capture, and in the case of juvenile fish, year of hatching. N = number of individuals genotyped. For genetic assignment of individuals from the commercial and recreational fisheries, we pooled all inner fjord samples and both North Sea samples (indicated in *italics*), thereby obtaining two baseline samples for assignments, as explained in the text. Outer samples were used for characterizing population structure in the area and for evaluating precision of genetic assignments.

| Locality (Abbr.) | Year | n |  | Adult/juvenile |
| --- | --- | --- | --- | --- |
| *Kristiansand inner fjord (KR inner)* | *2000* | *15* |  | *juv* |
|  | *2005* | *16* |  | *juv* |
|  | *2008* | *17* |  | *juv* |
| Kristiansand outer (KR outer) | 2000 | 16 |  | juv |
|  | 2005 | 26 |  | juv |
|  | 2008 | 6 |  | juv |
| *Lillesand inner fjord (LI inner)* | *2004* | *4* |  | *juv* |
|  | *2005* | *13* |  | *juv* |
|  | *2010* | *30* |  | *juv* |
| Lillesand outer (LI outer) | 2004 | 48 |  | juv |
| *Risør inner fjord (RI inner)* | *1997* | *10* |  | *juv* |
|  | *1998* | *10* |  | *juv* |
|  | *2004* | *10* |  | *juv* |
|  | *2005* | *18* |  | *juv* |
| Risør outer (RI outer) | 1998 | 12 |  | juv |
|  | 2004 | 12 |  | juv |
|  | 2005 | 24 |  | juv |
| *North Sea SE (NS south)* | *2002* | *43* |  | *adult* |
| *North Sea NW (NS north)* | *2012* | *48* |  | *adult* |

**Table S2.** SNPs selected for screenings of recreational and commercial trawl cod and accessions in the dbSNP database (www.ncbi.nlm.nih.gov/SNP). Errors refer to number and types of discrepancies between 40-plex Sequenom and 12k SNP-chip genotype scorings among a subsample of 95 fish from reference localities NS north and LI inner (cf. Table S1). *Italicized* loci were omitted from further analyses because of excessive number of errors in the Sequenom panel. MAF is the mean minor allele frequency in the two baseline samples (i.e., pooled North Sea and pooled inner fjords samples), and *F*ST represents the genetic divergence between them (genotypes for baseline samples taken from the 12k SNP chip panel). CLG indicates the linkage group (chromosome) where the SNP reside.

| SNP locus | Errors* | CLG | MAF | *F*ST |
| --- | --- | --- | --- | --- |
| ss1712295890 | 0 | 4 | 0.479 | 0.347 |
| ss1712296565 | 1 (-A) | 4 | 0.434 | 0.154 |
| *ss1712296783* | *20 (all -A)* | *23* | *0.428* | *0.063* |
| ss1712297081 | 0 | 16 | 0.437 | 0.094 |
| ss1712297159 | 0 | 8 | 0.456 | 0.414 |
| ss1712297319 | 1 (+A) | 19 | 0.245 | 0.141 |
| ss1712297476 | 0 | 13 | 0.302 | 0.060 |
| ss1712297702 | 0 | 15 | 0.099 | 0.119 |
| ss1712297946 | 0 | 2 | 0.317 | 0.282 |
| ss1712297985 | 0 | 16 | 0.384 | 0.266 |
| ss1712298141 | 2 (both -A) | 18 | 0.255 | 0.168 |
| ss1712298913 | 1 (-A) | 12 | 0.448 | 0.311 |
| ss1712298954 | 0 | 20 | 0.296 | 0.100 |
| ss1712299108 | 0 | 9 | 0.309 | 0.112 |
| ss1712299621 | *na* | 17 | 0.337 | 0.207 |
| ss1712300625 | 0 | 10 | 0.359 | 0.157 |
| ss1712300777 | 2 (both -A) | 16 | 0.463 | 0.090 |
| ss1712300779 | 0 | 16 | 0.310 | 0.047 |
| ss1712300848 | 0 | 12 | 0.115 | 0.094 |
| ss1712301111 | 0 | 12 | 0.243 | 0.264 |
| ss1712301578 | 0 | 7 | 0.419 | 0.072 |
| ss1712301593 | 0 | 9 | 0.140 | 0.123 |
| ss1712302403 | 0 | 16 | 0.326 | 0.123 |
| ss1712302534 | 1 (-A) | 14 | 0.380 | 0.059 |
| ss1712303294 | 0 | 12 | 0.404 | 0.236 |
| ss1712303465 | 0 | 14 | 0.138 | 0.160 |
| ss1712303563 | 0 | 1 | 0.354 | 0.084 |
| ss1712303675 | 0 | 16 | 0.426 | 0.088 |
| *ss1712304746* | *18 (all -A)* | *7* | *0.094* | *0.083* |

*) -A = loss of allele (i.e., heterozygote scored as homozygote); +A = additional allele (homozygote scored as heterozygote); *na* = not assessed (locus not scored on the Sequenom platform).

**Table S3.** Results (log probability of data) of STRUCTURE analyses of 5758 unlinked SNP loci in the population samples in Table S1. K is the number of predefined groups or “populations” and ln P(K | Data) is the corresponding log probability given the genotype data. Correlated allele frequency model used, without using prior information on sample locality. Note highest probability for K=2 (in *italics*).

| K | ln P(K|Data) |
| --- | --- |
| 1 | -2318519.9 |
| *2* | *-2311297.5* |
| 3 | -2312517.3 |
| 4 | -2314828.1 |
| 5 | -2313555.3 |

**Table S4**. Self-assignments of the North Sea and inner fjord baseline samples. Calculatuions with *gsi_sim*.

|  |  | Assigned to | |
| --- | --- | --- | --- |
| Sample |  | Inner fjord | North Sea |
| Inner fjord baseline |  | 121 | 22 |
| North Sea baseline |  | 3 | 88 |

**Table S5.** Proportions of cod stock components in the commercial trawl and in the recreational fisheries estimated with the *gsi_sim* software. Point estimates (mean) and associated standard deviations (SD) are given.

|  |  | Commercial trawl | |  | Recreational fishery | |
| --- | --- | --- | --- | --- | --- | --- |
| Stock component |  | mean | SD |  | mean | SD |
| Inner fjord |  | 0.0351 | 0.0114 |  | 0.1142 | 0.0178 |
| North Sea |  | 0.9649 | 0.0114 |  | 0.8858 | 0.0178 |

**Table S6**. Proportions of cod stock components in the commercial trawl and in the recreational fisheries estimated with the *ONCOR* software. Point estimates (mean) and associated 95% confidence intervals (CI) are given.

|  |  | Commercial trawl | |  | Recreational fishery | |
| --- | --- | --- | --- | --- | --- | --- |
| Stock component |  | mean | 95% CI |  | mean | 95% CI |
| Inner fjord |  | 0.0333 | 0.012-0.056 |  | 0.1132 | 0.078-0.149 |
| North Sea |  | 0.9667 | 0.944-0.988 |  | 0.8868 | 0.851-0.922 |
